# Supplementary material
Source: publisher figshare collection journal article supplement (https://asha.figshare.com/articles/dataset/_/5643076)
Supplement: Supplementary file 2 [file 1]

# 情绪能力的早期发展： 一套专为有复杂沟通需求儿童设计的工具

---

Na, Wilkinson, Epstein, Rangel, Townsend, Thistle, Feldman, and Blackstone (2014)

梁家利翻译

初版 (2012)

修订版 (2013)

目前版本 (2014)

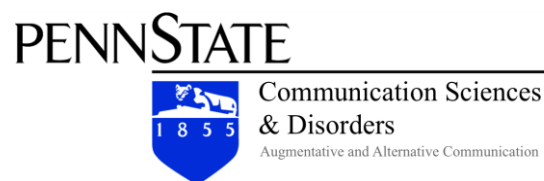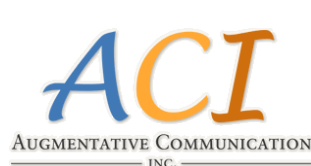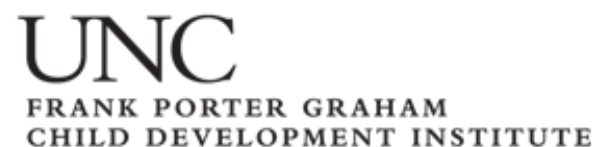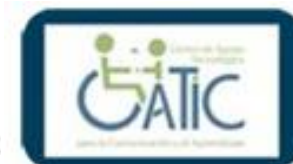

Ji Young Na (edectool@gmail.com)

## 情绪能力的早期发展：一套专为有复杂沟通需求儿童设计的工具

### 关于 EDEC 工具

#### 什么是 EDEC 工具？

EDEC 是一套描述性工具。它用于获取一下信息：家庭和专业人士是如何跟有复杂沟通需求的儿童谈论情绪的。它包括对为儿童的家庭服务的专业人士和其他专业服务人士进行的采访。

#### 我们为什么开发 EDEC 工具？

EDEC 工具致力于提高对语言和情绪能力之间的关系的认识，确保儿童的沟通干预包含在和家庭价值观与目标相一致的方法的前提下使用语言来谈论情绪。这套工具不用于规定性质，也不是作为常模参照工具，而是意于让专业人士和家庭成员与其他专业人士合作以获取对支持情绪沟通有帮助的信息。

#### 目标人群

EDEC 工具开发的目标人群是有复杂沟通需求的儿童（出生到 10 岁）。由于各种病因（脑瘫，唐氏综合症等），他们的言语语言技巧非常有限。工具的作者并未把这套工具的目标人群扩展到其他个人或自闭症患者。

#### 使用 EDEC 工具的人群

言语治疗师或者其他专业人士（例如作业治疗师，物理治疗师）为有复杂沟通需求的儿童提供服务时，使用这套工具来对儿童的护理人或其他专业人士（例如，老师）进行采访。为了更好了解儿童在不同情境下的特点特征，推荐同时采访儿童的护理人和老师或治疗师。

#### 完成需花多长时间？

一般情况下，需要 45 分钟到 1 小时来使用 EDEC 工具完成采访。过往采访持续 30 分钟到一个小时。如果您没有时间，您可以保存完成了的采访部分，再继续完成剩下部分。

#### 使用语言

EDEC 工具能用于不同语言背景。目前我们有丹麦语，英语，韩语，西班牙语，和汉语版本。将来会有荷兰语，德语，法语版本。有其他语言需求的，请联系作者。

#### 有在线版本吗？

EDEC 工具也有在线版本。作者会给您提供链接，使用该链接即可获取此套工具。如有兴趣，请联系作者。

### 具体内容与组织结构

- EDEC 工具分两部分。第一部分询问父母或者护理人和（或）老师对儿童性格的感知。第二部分询问关于儿童及其目前表达情绪情感的能力，儿童的父母或护理人在家中表达情绪的方法，和儿童的父母或护理人是否与自己的孩子谈论情绪或情感。
- 我们推荐您从第一部分开始。这是因为在讨论儿童的情绪表达和认知情况之前，从第一部分获取的信息可能会帮助采访人对儿童有一个更好的了解。
- 如果有需要，采访人可以给父母或护理人提供每个问题中提供的例子。

情绪能力的早期发展：  
一套专为有复杂沟通需求儿童设计的工具

(Na, Wilkinson, Epstein, Rangel, Townsend, Thistle, Feldman, & Blackstone, 2014)

背景信息。请填写以下的所有信息。

|            |                              |
|------------|------------------------------|
| 儿童（拼音首字母）： | 测试官（拼音首字母）：                  |
| 出生日期：      | 职业：                          |
| 国籍：        | 被采访人/告知信息者（拼音首字母）：           |
| 儿童的诊断结果：   | 角色（例如，父母，老师）：                |
| 采访日期：      | 采访中使用的语言：                    |
|            | 丹麦语          荷兰语          英语 |
|            | 法语          德语          韩语   |
|            | 西班牙语      汉语          其他     |

背景信息结束。  
请翻至第一部分。

|                                                                          |   |                                                 |     |    |
|--------------------------------------------------------------------------|---|-------------------------------------------------|-----|----|
| 第一部分：关于气质或行为特征的问题（改编于 Caspi & Shiner, 2008）                              |   |                                                 |     |    |
| 【气质指的是影响一个人对经历的思考，行为和行动的特点特征】测试官通过以下问题来获取有复杂沟通需要儿童的信息。                   |   |                                                 |     |    |
| 1a. 基本描述词或短语 - 开放性                                                       |   |                                                 |     |    |
| “我们想知道一些关于{名字}的总体个性。您能描述一下吗？”                                            |   |                                                 |     |    |
| 写下护理人自发提供的形容词                                                            |   |                                                 |     |    |
| 1b. 基本描述词或短语 - 引导性                                                       |   | 对每个问题的回答将按照以下测量范围：                              |     |    |
| 护理人很有可能会说出一些右表上列出的形容词。不要提问护理人已说过的词，而是诱导护理人说出此前没有提及的信息。                   |   | 基本符合选项 ---- a                                   |     |    |
| “谢谢 - 这个非常有帮助。这里我还有一些其他的气质个性特点我想问您一下。                                    |   | 基本符合选项 ---- b                                   |     |    |
| “我会给您一些描述个性的词。您只需要告诉我您的小孩的总体个性有没有跟这些词相近的。如果{名字}处在中间，您就告诉我。如果您不确定，也请告诉我。” |   | 不在两个极端 ---- 二者中间                                |     |    |
|                                                                          |   | 不确定                                             |     |    |
|                                                                          |   | 经常                                              |     |    |
|                                                                          |   | 经常                                              |     |    |
|                                                                          |   | 1. 活动 1a. 积极 ----- 二者中间 ----- 1b. 懈怠 不确定        |     |    |
|                                                                          |   | 2. 生活规律 2a. 可预测 ----- 二者中间 ----- 2b. 不可预测 不确定   |     |    |
|                                                                          |   | (饮食睡眠模式) (波动)                                   |     |    |
|                                                                          |   | 3. 接近/退缩 3a. 害羞 ----- 二者中间 ----- 3b. 外向 不确定     |     |    |
|                                                                          |   | 4. 适应性 4a. 容易适应 ----- 二者中间 ----- 4b. 顽固 不确定     |     |    |
|                                                                          |   | (过渡性)                                           |     |    |
|                                                                          |   | 5. 反应强度 5a. 魅力型 ----- 二者中间 ----- 5b. 拘泥型 不确定    |     |    |
|                                                                          |   | 6. 心境 6a. 悲观 ----- 二者中间 ----- 6b. 乐观 不确定        |     |    |
|                                                                          |   | 7. 坚毅性 7a. 较长 ----- 二者中间 ----- 7b. 较短 不确定       |     |    |
|                                                                          |   | (注意力跨度)                                         |     |    |
|                                                                          |   | 8. 感官阈限 8a. 敏感 ----- 二者中间 ----- 8b. 能忽视 不确定     |     |    |
|                                                                          |   | (对刺激的敏感度)                                       |     |    |
|                                                                          |   | 9. 被分心性 9a. 易被分心 ----- 二者中间 ----- 9b. 不易被分心 不确定 |     |    |
| 评价                                                                       |   |                                                 |     |    |
|                                                                          |   |                                                 |     |    |
| 2. 社会交往                                                                  | 是 | 不是                                              | 不确定 | 评价 |
| “{名字}看起来喜欢跟其他人在一起吗？”                                                     |   |                                                 |     |    |
|                                                                          |   |                                                 |     |    |

|                                                                                                                      |    |    |     |      |     |    |
|----------------------------------------------------------------------------------------------------------------------|----|----|-----|------|-----|----|
|                                                                                                                      |    |    |     |      |     |    |
| 3. 社会亲密度或感情意向<br><br>“您会说{名字}总体来说喜欢和别人亲近吗？”<br><br>“{名字}最有可能对谁表示亲近之情？”<br><br>在评价栏写下对第二问题的回答                         | 是  | 不是 | 不确定 | 评价   |     |    |
|                                                                                                                      |    |    |     |      |     |    |
| 4. 小孩贴近的人<br><br>“{名字}最喜欢黏谁？她/他是怎么样黏的呢（哪怕表现的方式不是亲密的那种）？比如说，当这个人离开时，{名字}会表现出伤心忧愁；而当这个人回来时，{名字}又变得高兴开心了。”              |    |    |     |      | 评价  |    |
|                                                                                                                      |    |    |     |      |     |    |
| 5. 同龄人互动<br><br>“请描述一下{名字}怎么样和同龄人互动的。比如说，她/他会跟别的小孩一起玩吗？总体来说，她/他会跟其他人相处得好吗？”                                          |    |    |     |      | 评价  |    |
|                                                                                                                      |    |    |     |      |     |    |
| 6. 对陌生人的反应 reaction to strangers<br><br>“{名字}会多经常表现出对陌生人的恐惧呢？她/他在不熟悉的环境中表现出害怕吗？您能给出一个例子讲一下她/他面对新的人或情况时的反应？”          | 经常 | 有时 | 极少  | 从来没有 | 不确定 | 评价 |
|                                                                                                                      |    |    |     |      |     |    |
| 7. 脾气<br><br>“很多小孩至少会有一次大哭大闹的坏脾气经历。{名字}有这样的情况吗？”<br><br>如果护理人说是，继续问“你觉得这样的情况多久发生一次呢（比如，一天一次）？当这种情况发生时，您和其他大人会怎么应对呢？” |    |    |     |      | 评价  |    |
|                                                                                                                      |    |    |     |      |     |    |

|                                                                                                                                               |    |
|-----------------------------------------------------------------------------------------------------------------------------------------------|----|
|                                                                                                                                               |    |
| <p>8. 自我伤害</p> <p>“当{名字}不高兴的时候，她/他会有意做一些事情来伤害自己吗？有时候小孩会要自己的手指，或者捏自己。”</p> <p>如果护理人说是，就问 “你觉得这样的情况多久发生一次呢（比如，一天一次）？当这种情况发生时，您和其他大人会怎么应对呢？”</p> | 评价 |
|                                                                                                                                               |    |
| <p>9. 攻击行为</p> <p>“她/他会有意做一些事情伤害伤害他人吗，比如说，咬人，打人，或捏人？”</p> <p>如果护理人说是，就问 “你觉得这样的情况多久发生一次呢（比如，一天一次）？当这种情况发生时，您和其他大人会怎么应对呢？”</p>                 | 评价 |
|                                                                                                                                               |    |
| <p>10. 破坏财物</p> <p>“{名字}会做有意有一些事情来破坏财务吗？”</p> <p>如果护理人说是，就问 “你觉得这样的情况多久发生一次呢（比如，一天一次）？当这种情况发生时，您和其他大人会怎么应对呢？”</p>                             | 评价 |
|                                                                                                                                               |    |
| <p><u>总结</u></p> <p>概述一下父母或护理人所说的话，包括 2-3 个正面特征或行为</p> <p>“我想花些时间来回顾一下到目前为止讲过的东西。您说{名字}有{2-3 个正面特征和行为}。我有没有漏掉什么信息呢？”</p>                      | 评价 |
|                                                                                                                                               |    |

第一部分结束。  
请翻至第二部分。

## 第二部分：关于有复杂沟通需求儿童和家庭动态情况的问题

列表改编于由研究人员确定的“初级”和“中级或高级”情绪（Ekman, Friesen, & Ellsworth, 1972 and Parrott, 2001）

在第二部分，父母或护理人能直接讲述出自己家庭在小孩在场的情况下处理情绪的方式。老师和治疗师会报告他们的观察。

### 1a. 儿童表达的基本情绪

“首先，我想问一下您小孩表达的情绪。我想知道您小孩经常表达例如爱，生气这样的情绪吗？您能想一下您小孩对每种情绪表达的频率吗（经常，有时，极少，从未）。如果您不确定，请告诉我。”

“您小孩多久会表达一下情绪呢【从 1a 开始】？”

如果被采访人说“不确定”，请继续问“为什么您不确定呢？”比如说，被采访人仅仅是没观察到这种行为，或者是她/他觉得小孩缺乏表现这种行为的机会。

| 1a. 基本情绪 | 经常 | 有时 | 极少 | 从来没有 | 不确定 | 评价 |
|----------|----|----|----|------|-----|----|
| 挚爱/ 热爱   |    |    |    |      |     |    |
| 生气       |    |    |    |      |     |    |
| 厌恶       |    |    |    |      |     |    |
| 害怕       |    |    |    |      |     |    |
| 高兴/ 欣喜   |    |    |    |      |     |    |
| 哀伤       |    |    |    |      |     |    |
| 惊讶       |    |    |    |      |     |    |

### 1b. 小孩表达的其他情绪。

“谢谢。刚才的情绪都被认为是在早期就发展的了。我想说一下其他比较后期才发展的或者比较难表达的情绪。当我念到这些，您只需要告诉我您是否见过您小孩表达过这些情绪。”

“您小孩表达过【从 1b 开始】？”

| 其他情绪 | 是 | 否 | 评价 |        | 是 | 否 | 评价 |
|------|---|---|----|--------|---|---|----|
| 爱慕   |   |   |    | 羡慕/嫉妒  |   |   |    |
| 惊奇   |   |   |    | 骄傲     |   |   |    |
| 愉悦   |   |   |    | 焦虑/紧张  |   |   |    |
| 失望   |   |   |    | 烦心/ 挫败 |   |   |    |
| 激动   |   |   |    | 羞愧/ 尴尬 |   |   |    |

|                                                                                                                                                                               |                                                                                                                                                                                                                                                                                                   |       |
|-------------------------------------------------------------------------------------------------------------------------------------------------------------------------------|---------------------------------------------------------------------------------------------------------------------------------------------------------------------------------------------------------------------------------------------------------------------------------------------------|-------|
| <p>1c. 儿童表达的其他情绪【此问题应当向所有参与者提问】</p> <p>“我现在确定一下自己没有遗漏任何东西，您能描述一下自己小孩表达了我们没谈论过得情绪吗？”</p> <p>如果参与者提供其他情绪，就问参与者“您能告诉我她/他表达这种情绪的时候吗？”</p>                                         |                                                                                                                                                                                                                                                                                                   | 其他情绪： |
|                                                                                                                                                                               |                                                                                                                                                                                                                                                                                                   |       |
| <p>2. 儿童表达情绪的方法</p> <p>“现在我想说一下{名字}表达情绪的方法。首先，我们会说小孩表达情绪的一些方法，您只需要说“是”或“不是”。然后，如果我遗漏任何东西，您就添加进去。</p> <p>接下来，从左到右说出列表内容。如果父母说“是”，就请家长提供例子。虽然我们把非语言 and 语言形式分开，您就把它当做一个长列表。</p> | 非言语                                                                                                                                                                                                                                                                                               | 例子    |
|                                                                                                                                                                               | <input type="radio"/> 面部表情<br><input type="radio"/> 肢体动作<br><input type="radio"/> 手势<br><input type="radio"/> 发声<br><input type="radio"/> 其他_____                                                                                                                                                 |       |
|                                                                                                                                                                               | 言语                                                                                                                                                                                                                                                                                                | 例子    |
|                                                                                                                                                                               | <input type="radio"/> 语音<br><input type="radio"/> 手势/手语<br><input type="radio"/> 非电子沟通显示板上的标志或文字<br><input type="radio"/> 简单辅助沟通器具上的标志或文字<br><input type="radio"/> 合成语音辅助沟通系统上的标志或文字<br><input type="radio"/> 带有应用或软件的移动设备或电脑上的标志或文字<br><input type="radio"/> 书写<br><input type="radio"/> 其他_____ |       |
| <p>题目分支点：</p> <p>+ 如果只用到了“非言语”方法（面部表情到发声），跳至第七题。</p> <p>+ 如果用到了“言语”方法（语音到书写）中的任何一个，无论有没有用到“非语言”方法，从第三题开始。</p>                                                                 |                                                                                                                                                                                                                                                                                                   |       |
| <p>3. 标记情绪的存量</p> <p>如果第二题中只选择了辅助型的模式（标志或文字），提问 3a。如果不是，跳至 3b。</p> <p>3a. “她/他的情绪标记系统里，有多少个词语或标志？”</p>                                                                        | <input type="radio"/> 少于 6 个图形标志或词语<br><input type="radio"/> 6 到 10 个图形标志或词语<br><input type="radio"/> 11 到 20 个图形标志或词语<br><input type="radio"/> 多于 20 个图形标志或词语<br><input type="radio"/> 多于 50 个图形标志或词语                                                                                            | 例子    |



|                                                                                                                                                                                                      |                                                                                                                                                                                                                       |           |           |             |            |           |
|------------------------------------------------------------------------------------------------------------------------------------------------------------------------------------------------------|-----------------------------------------------------------------------------------------------------------------------------------------------------------------------------------------------------------------------|-----------|-----------|-------------|------------|-----------|
| <p>3b. “{名字}用多少记号，词语或其它标志来标记情绪呢？<br/>{名字}用了哪些具体的词语或标志吗？”</p>                                                                                                                                         | <input type="radio"/> 少于 6 个图形标志或词语或标记<br><input type="radio"/> 6 到 10 个图形标志或词语或标记<br><input type="radio"/> 11 到 20 个图形标志或词语或标记<br><input type="radio"/> 多于 20 个图形标志或词语或标记<br><input type="radio"/> 多于 50 个图形标志或词语或标记 |           |           |             |            | <p>例子</p> |
| <p>3c. “{名字}用多少记号，词语或其它标志来谈论相关事件（比如说，为什么她/他有这样的情绪，她/他想要什么）？<br/>{名字}用了哪些具体的词语或标志吗？”</p>                                                                                                              | <input type="radio"/> 少于 6 个图形标志或词语或标记<br><input type="radio"/> 6 到 10 个图形标志或词语或标记<br><input type="radio"/> 11 到 20 个图形标志或词语或标记<br><input type="radio"/> 多于 20 个图形标志或词语或标记<br><input type="radio"/> 多于 50 个图形标志或词语或标记 |           |           |             |            | <p>例子</p> |
| <p>4. 使用情境</p> <p>“{名字}在很多不同的情境下使用这些标志（记号，口头词语，和/或图形标志）吗？比如说，家里，学校，社区的 休闲活动，教堂，等等。”</p>                                                                                                              | <p>经常</p>                                                                                                                                                                                                             | <p>有时</p> | <p>极少</p> | <p>从来没有</p> | <p>不确定</p> | <p>例子</p> |
| <p>5. 标记其他人的情绪</p> <p>“当{名字}看到别人表达情绪时，她/他会使用标签或评论这些情绪吗？请给出例子。”</p>                                                                                                                                   | <p>经常</p>                                                                                                                                                                                                             | <p>有时</p> | <p>极少</p> | <p>从来没有</p> | <p>不确定</p> | <p>例子</p> |
| <p>6. 父母或护理人提醒小孩使用口头标记形式</p> <p>“不同家庭或护理人会使用不同的方法来提醒自己小孩使用口头标记来标签情绪。您会多经常尝试让{名字}去标记他们自己的情绪（使用词语，标记，标志）？”</p> <p>如果护理人回答“偶尔”或者“大部分时间”，就请护理人给出例子。</p> <p>如果护理人回答“偶尔”或者“从来没有”，就问护理人“好的，谢谢。那您会做什么呢？”</p> | <p>大部分时间</p>                                                                                                                                                                                                          | <p>有时</p> | <p>偶尔</p> | <p>从来没有</p> | <p>不确定</p> | <p>例子</p> |

|                                                                                                                                                                     |               |                  |                  |             |            |           |
|---------------------------------------------------------------------------------------------------------------------------------------------------------------------|---------------|------------------|------------------|-------------|------------|-----------|
| <p>7. 父母或护理人反应</p> <p>“当{名字}表达情绪的时候，您怎么回应呢？”</p> <p>勾上所有符合情况的选项，同时要求提供例子。</p>                                                                                       | <p>回应情绪本身</p> | <p>谈论产生情绪的原因</p> | <p>谈论化解情绪的方法</p> | <p>忽视情绪</p> |            |           |
| <p>8. 儿童对情绪的认知和反应</p> <p>8a. “现在，我们来谈论一下{名字}是怎么样回应他人的情绪的。当别人表达情绪的时候，{名字}是怎么样回应的？比如说，当每个人都在为一个体育事件雀跃的时候【或其他文化上合适的事件】，{名字}会加入吗？当一个同班同学的膝盖在运动场上被刮伤了的时候，{名字}会做什么吗？”</p> | <p>评价</p>     |                  |                  |             |            |           |
| <p>8b. “关于{名字}表现这些回应的频率？”</p>                                                                                                                                       | <p>大部分时间</p>  | <p>有时</p>        | <p>偶尔</p>        | <p>从来没有</p> | <p>不确定</p> | <p>例子</p> |
| <p>9. 护理人的情绪表达：第一部分</p> <p>“不同的家庭或护理人在小孩面前会使用不同的方式来表达自己的情绪。您在{名字}面前会放心表达哪种情绪呢？为什么，或者这是在什么情况下出现的？”</p>                                                               | <p>评价</p>     |                  |                  |             |            |           |
| <p>10. 护理人的情绪表达：第二部分</p> <p>“您会有一些尽量不在{名字}面前表达的情绪吗？为什么，或者这是在什么情况下出现的？”</p>                                                                                          | <p>评价</p>     |                  |                  |             |            |           |

|                                                                                                                   |    |    |    |      |     |    |
|-------------------------------------------------------------------------------------------------------------------|----|----|----|------|-----|----|
| <p>11. 输入策略</p> <p>“当您跟您小孩分享或谈论情绪的时候，您说或者做什么呢？比如说，您会跟小孩一起读关于情绪的书吗？您解释里面的情绪吗？您会加以说明吗？”</p>                         | 评价 |    |    |      |     |    |
| <p>12. 处理焦虑场景</p> <p>“在困难或挑战面前（或当中）我们都会经历焦虑。您和您的小孩是怎么样为这种任务或事件作出调整的？您在之后又是怎么样回调的？哪种看起来最有效？（比如说，看医生，上学第一天，等）”</p>  | 评价 |    |    |      |     |    |
| <p>13. 与媒体（书籍，视频，等）互动 - 总体情况</p> <p>“{名字}会喜欢听或者读故事，看视频，等吗？【此问题强调书籍，故事，视频，和其他媒体在让儿童接触情绪性经历当中扮演的的重要角色】您能给出例子吗？”</p> | 经常 | 有时 | 极少 | 从来没有 | 不确定 | 例子 |
| <p>14. 与媒体（书籍，视频，等）互动 - 输入情况</p> <p>“当您读书或看电视电影是，您会谈论角色所经历的情绪吗？”</p>                                              | 会  | 不会 | 例子 |      |     |    |

EDEC 工具结束。  
谢谢您的参与！
