# Supplementary material
Source: publisher figshare collection journal article supplement (https://asha.figshare.com/articles/dataset/_/5643076)
Supplement: Supplementary file 3 [file 1]

Early Development of Emotional Competence (EDEC)

# 아동 초기 정서 발달 검사: 의사소통 장애 아동 대상

Na, Wilkinson, Epstein, Rangel, Townsend, Thistle, Feldman, Blackstone 공저 (2014)

나지영 번역

초본 (2012)

개정본 (2013)

최종본 (2014)

PENNSSTATE

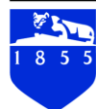

Communication Sciences  
& Disorders  
Augmentative and Alternative Communication

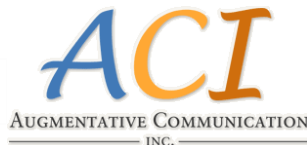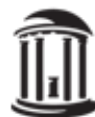

UNC  
FRANK PORTER GRAHAM  
CHILD DEVELOPMENT INSTITUTE

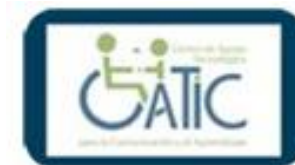

담당 저자: 나지영, Ji Young Na (edectool@gmail.com)

## 아동 초기 정서 발달: 의사소통 장애 아동 대상 검사 도구에 대하여

### 아동 초기 정서 발달: 의사소통 장애 아동 대상 검사 도구란 무엇인가?

이 검사도구는 의사소통 장애 아동의 가족이나 전문가들이 이 아이들과 어떻게 감정에 대하여 대화하는지를 알아보는 평가 도구입니다. 이 도구를 사용하여 전문가가 아동의 가족이나 다른 전문가와 인터뷰를 진행합니다.

### 왜 이 검사도구를 개발하였나?

이 검사도구는 언어와 감정 능력간의 관계에 대한 인식을 높이고, 장애 아동을 위한 치료가 아동의 감정언어 발달을 위한 목표도 포함시키도록 권장하기 위하여 개발되었습니다. 이 검사 도구는 진단이나 처방을 위한 목표로 개발된 것이 아니며, 전문가들이 가족 구성원들 그리고 다른 전문가들과 함께 협력하여 아이의 감정 언어 발달에 대한 정보를 공유하고, 그에 따른 치료를 지원하기 위하여 개발되었습니다.

### 검사 대상

이 검사도구는 0 세부터 10 세까지의 의사소통 장애를 가진 아동들을 대상으로 하고 있습니다. 의사소통 장애를 가진 아동들은 뇌병변, 다운 증후군 등의 다양한 원인으로 인해 말과 언어에 대한 능력이 매우 제한되어 있는 아동들을 말합니다. 현재로서는 이 검사 도구는 자폐아 아동을 대상으로는 하지는 않습니다.

### 누가 이 검사를 할 수 있나?

의사소통 장애를 가진 아동의 치료를 담당하는 언어치료사나 다른 치료사들 (예: 물리치료사, 작업치료사)이 이 검사 도구를 사용하여 아동의 부모님이나 다른 전문가들을 (예: 선생님) 인터뷰합니다. 다양한 환경에서 나타나는 아동의 특성을 더 잘 이해하기 위하여, 아동의 부모님과 선생님/치료사를 모두 인터뷰하기를 권장합니다.

### 얼마나 오래 걸리나?

기존 검사 진행 기록에 따르면, 이 검사는 대략 45 분에서 한 시간 정도 소요됩니다. 시간이 부족한 경우에는 인터뷰를 멈춘 부분에서부터 다음 기회에 이어서 시작할 수 있습니다.

### 언어

이 검사 도구는 다양한 언어로 개발되었습니다. 현재, 덴마크어, 영어, 한국어, 스페인어, 독일어 버전이 개발되어 있고, 프랑스어와 네덜란드어 버전은 개발중에 있습니다. 다른 언어 버전에 대한 정보가 필요하신 분께서는 저자에게 연락을 하시면 됩니다.

### 온라인 버전?

이 검사 도구는 온라인 버전도 개발되어 있습니다. 온라인 버전은 저자가 부여하는 링크를 통해 사용합니다. 온라인 버전에 대한 정보가 필요하신 분께서는 저자에게 연락하시면 됩니다.

## 내용과 구성

- 이 검사도구는 두개의 섹션으로 구성되어 있습니다. 섹션 I 은 장애 아동의 부모님이나 선생님께서 아동의 기질에 대해 어떻게 인식하고 계신지에 대해 묻습니다. 섹션 II 는 장애 아동이 감정/느낌을 표현하고 인식하는 능력, 그리고 부모님과 아동의 감정에 대한 대화 등에 대해 묻습니다. 섹션 I 을 먼저 진행한 후, 아동에 대한 충분한 이해를 바탕으로 섹션 II 를 진행하십시오.
- 검사지에 제시된 예시들은 인터뷰를 진행하면서 필요할 경우에만 제공하시면 됩니다.

## 아동 초기 정서 발달: 의사소통 장애 아동 대상 검사 도구

(Na, Wilkinson, Epstein, Rangel, Townsend, Thistle, Feldman, Blackstone, 2014)

배경 정보. 아래에 있는 모든 배경 정보를 기록하여 주세요.

아동 이니셜 (예: 김차돌→KCD):

아동 생년월일 (월/일/년도) (예: 12/31/2009):

국적 (예: 대한민국):

아동의 진단명 (예: 다운 증후군, 뇌병변):

기록 날짜 (월/일/년도) (예: 12/31/2012):

검사자 이니셜 (예: 나지영→NJY):

검사자 직업 (예: 언어치료사):

응답자 이니셜 (예: 이영희→LYH)

응답자와 아동과의 관계 (예: 부모님, 선생님):

기록 언어:

덴마크어

네덜란드어

영어

프랑스어

독일어

한국어

스페인어

기타\_\_\_\_\_

검사 방법에 대한 설명이 끝났습니다.  
이제 영역 I 로 가서, 질문하십시오.

| 영역 I. 아동의 기질적/행동적 특성에 관한 질문 (Caspi & Shiner, 2008 에서 인용)                                                                                                                                                                                                                                                                                                    |                                                                                                                                                                                                                                                                                                                                                                                                                                                                                                                                                                                                                                                                                                                                                                                                                                                                                                                                                                                                                                                                                                                         |         |              |        |           |             |         |          |        |                      |               |         |            |        |        |                |         |             |        |               |                 |         |              |        |           |                  |         |          |        |       |              |         |         |        |         |            |         |        |        |           |              |         |             |        |           |              |         |             |        |
|-------------------------------------------------------------------------------------------------------------------------------------------------------------------------------------------------------------------------------------------------------------------------------------------------------------------------------------------------------------|-------------------------------------------------------------------------------------------------------------------------------------------------------------------------------------------------------------------------------------------------------------------------------------------------------------------------------------------------------------------------------------------------------------------------------------------------------------------------------------------------------------------------------------------------------------------------------------------------------------------------------------------------------------------------------------------------------------------------------------------------------------------------------------------------------------------------------------------------------------------------------------------------------------------------------------------------------------------------------------------------------------------------------------------------------------------------------------------------------------------------|---------|--------------|--------|-----------|-------------|---------|----------|--------|----------------------|---------------|---------|------------|--------|--------|----------------|---------|-------------|--------|---------------|-----------------|---------|--------------|--------|-----------|------------------|---------|----------|--------|-------|--------------|---------|---------|--------|---------|------------|---------|--------|--------|-----------|--------------|---------|-------------|--------|-----------|--------------|---------|-------------|--------|
| [기질이란 사람의 생각, 행동, 반응에 영향을 미치는 그 사람의 특성을 말합니다.] 아래의 빨간색으로 쓰여진 지문을 사용하여 의사 소통장애 아동에 대하여 질문하십시오.                                                                                                                                                                                                                                                               |                                                                                                                                                                                                                                                                                                                                                                                                                                                                                                                                                                                                                                                                                                                                                                                                                                                                                                                                                                                                                                                                                                                         |         |              |        |           |             |         |          |        |                      |               |         |            |        |        |                |         |             |        |               |                 |         |              |        |           |                  |         |          |        |       |              |         |         |        |         |            |         |        |        |           |              |         |             |        |           |              |         |             |        |
| <p>1a. 기본적 묘사 - 주관식</p> <p>"{아동이름}의 성격이 어떤지에 대해서 조금 알아볼게요.<br/>{아동이름}가 어떤 아이인지 간략하게 말씀해주시겠어요?</p> <p>아동의 보호자가 스스로 사용한 단어들을 기록하십시오.</p>                                                                                                                                                                                                                      |                                                                                                                                                                                                                                                                                                                                                                                                                                                                                                                                                                                                                                                                                                                                                                                                                                                                                                                                                                                                                                                                                                                         |         |              |        |           |             |         |          |        |                      |               |         |            |        |        |                |         |             |        |               |                 |         |              |        |           |                  |         |          |        |       |              |         |         |        |         |            |         |        |        |           |              |         |             |        |           |              |         |             |        |
| <p>1b. 기본적 묘사 - 객관식</p> <p>다음의 단어들 중에서 아동의 보호자가 이미 앞 질문에서<br/>대답하지 않은 단어들에 대해서만 질문하십시오.</p> <p>"정말 감사합니다. 도움이 많이 되었습니다. 추가적으로<br/>성격에 대해서 몇 가지만 더 여쭙볼게요."</p> <p>"지금부터 성격을 묘사하는 단어들을 짝을 지어서 말씀을<br/>드릴 텐데요, 둘 중에 어떤 단어에 아이의 성격이 가까운지<br/>말씀해주시면 됩니다. {아동이름}가 말씀 드린 두 단어의<br/>중간인 것 같다고 생각되시면, 중간이라고 말씀해주시면<br/>됩니다. 잘 생각이 안 나서도 괜찮으니, 저에게<br/>말씀해주세요. "</p> | <p>각 질문의 보기 보기 중에 선택하도록 질문하십시오: 보통 a와 같은 편이다<br/>보통 b와 같은 편이다<br/>a도 b도 아닌 편이다 (중간)<br/>잘 모르겠다</p> <table border="0"> <tr> <td>1. 활발한 정도</td> <td>1a. 활발-----</td> <td>중간-----</td> <td>1b. 안 활발</td> <td>잘 모르겠음</td> </tr> <tr> <td>2. 규칙적 생활<br/>(식사/수면)</td> <td>2a. 규칙적임-----</td> <td>중간-----</td> <td>2b. 예측이 힘들</td> <td>잘 모르겠음</td> </tr> <tr> <td>3. 붙임성</td> <td>3a. 부끄러워함-----</td> <td>중간-----</td> <td>3b. 붙임성이 있음</td> <td>잘 모르겠음</td> </tr> <tr> <td>4. 변화에 대한 적응력</td> <td>4a. 적응을 잘함-----</td> <td>중간-----</td> <td>4b. 적응을 힘들어함</td> <td>잘 모르겠음</td> </tr> <tr> <td>5. 반응의 정도</td> <td>5a. 카리스마 있음-----</td> <td>중간-----</td> <td>5b. 내성적임</td> <td>잘 모르겠음</td> </tr> <tr> <td>6. 기분</td> <td>6a. 비관적-----</td> <td>중간-----</td> <td>6b. 낙관적</td> <td>잘 모르겠음</td> </tr> <tr> <td>7. 집중시간</td> <td>7a. 김-----</td> <td>중간-----</td> <td>7b. 짧음</td> <td>잘 모르겠음</td> </tr> <tr> <td>8. 예민한 정도</td> <td>8a. 예민함-----</td> <td>중간-----</td> <td>8b. 예민하지 않음</td> <td>잘 모르겠음</td> </tr> <tr> <td>9. 산만한 정도</td> <td>9a. 산만함-----</td> <td>중간-----</td> <td>9b. 산만하지 않음</td> <td>잘 모르겠음</td> </tr> </table> |         |              |        | 1. 활발한 정도 | 1a. 활발----- | 중간----- | 1b. 안 활발 | 잘 모르겠음 | 2. 규칙적 생활<br>(식사/수면) | 2a. 규칙적임----- | 중간----- | 2b. 예측이 힘들 | 잘 모르겠음 | 3. 붙임성 | 3a. 부끄러워함----- | 중간----- | 3b. 붙임성이 있음 | 잘 모르겠음 | 4. 변화에 대한 적응력 | 4a. 적응을 잘함----- | 중간----- | 4b. 적응을 힘들어함 | 잘 모르겠음 | 5. 반응의 정도 | 5a. 카리스마 있음----- | 중간----- | 5b. 내성적임 | 잘 모르겠음 | 6. 기분 | 6a. 비관적----- | 중간----- | 6b. 낙관적 | 잘 모르겠음 | 7. 집중시간 | 7a. 김----- | 중간----- | 7b. 짧음 | 잘 모르겠음 | 8. 예민한 정도 | 8a. 예민함----- | 중간----- | 8b. 예민하지 않음 | 잘 모르겠음 | 9. 산만한 정도 | 9a. 산만함----- | 중간----- | 9b. 산만하지 않음 | 잘 모르겠음 |
| 1. 활발한 정도                                                                                                                                                                                                                                                                                                                                                   | 1a. 활발-----                                                                                                                                                                                                                                                                                                                                                                                                                                                                                                                                                                                                                                                                                                                                                                                                                                                                                                                                                                                                                                                                                                             | 중간----- | 1b. 안 활발     | 잘 모르겠음 |           |             |         |          |        |                      |               |         |            |        |        |                |         |             |        |               |                 |         |              |        |           |                  |         |          |        |       |              |         |         |        |         |            |         |        |        |           |              |         |             |        |           |              |         |             |        |
| 2. 규칙적 생활<br>(식사/수면)                                                                                                                                                                                                                                                                                                                                        | 2a. 규칙적임-----                                                                                                                                                                                                                                                                                                                                                                                                                                                                                                                                                                                                                                                                                                                                                                                                                                                                                                                                                                                                                                                                                                           | 중간----- | 2b. 예측이 힘들   | 잘 모르겠음 |           |             |         |          |        |                      |               |         |            |        |        |                |         |             |        |               |                 |         |              |        |           |                  |         |          |        |       |              |         |         |        |         |            |         |        |        |           |              |         |             |        |           |              |         |             |        |
| 3. 붙임성                                                                                                                                                                                                                                                                                                                                                      | 3a. 부끄러워함-----                                                                                                                                                                                                                                                                                                                                                                                                                                                                                                                                                                                                                                                                                                                                                                                                                                                                                                                                                                                                                                                                                                          | 중간----- | 3b. 붙임성이 있음  | 잘 모르겠음 |           |             |         |          |        |                      |               |         |            |        |        |                |         |             |        |               |                 |         |              |        |           |                  |         |          |        |       |              |         |         |        |         |            |         |        |        |           |              |         |             |        |           |              |         |             |        |
| 4. 변화에 대한 적응력                                                                                                                                                                                                                                                                                                                                               | 4a. 적응을 잘함-----                                                                                                                                                                                                                                                                                                                                                                                                                                                                                                                                                                                                                                                                                                                                                                                                                                                                                                                                                                                                                                                                                                         | 중간----- | 4b. 적응을 힘들어함 | 잘 모르겠음 |           |             |         |          |        |                      |               |         |            |        |        |                |         |             |        |               |                 |         |              |        |           |                  |         |          |        |       |              |         |         |        |         |            |         |        |        |           |              |         |             |        |           |              |         |             |        |
| 5. 반응의 정도                                                                                                                                                                                                                                                                                                                                                   | 5a. 카리스마 있음-----                                                                                                                                                                                                                                                                                                                                                                                                                                                                                                                                                                                                                                                                                                                                                                                                                                                                                                                                                                                                                                                                                                        | 중간----- | 5b. 내성적임     | 잘 모르겠음 |           |             |         |          |        |                      |               |         |            |        |        |                |         |             |        |               |                 |         |              |        |           |                  |         |          |        |       |              |         |         |        |         |            |         |        |        |           |              |         |             |        |           |              |         |             |        |
| 6. 기분                                                                                                                                                                                                                                                                                                                                                       | 6a. 비관적-----                                                                                                                                                                                                                                                                                                                                                                                                                                                                                                                                                                                                                                                                                                                                                                                                                                                                                                                                                                                                                                                                                                            | 중간----- | 6b. 낙관적      | 잘 모르겠음 |           |             |         |          |        |                      |               |         |            |        |        |                |         |             |        |               |                 |         |              |        |           |                  |         |          |        |       |              |         |         |        |         |            |         |        |        |           |              |         |             |        |           |              |         |             |        |
| 7. 집중시간                                                                                                                                                                                                                                                                                                                                                     | 7a. 김-----                                                                                                                                                                                                                                                                                                                                                                                                                                                                                                                                                                                                                                                                                                                                                                                                                                                                                                                                                                                                                                                                                                              | 중간----- | 7b. 짧음       | 잘 모르겠음 |           |             |         |          |        |                      |               |         |            |        |        |                |         |             |        |               |                 |         |              |        |           |                  |         |          |        |       |              |         |         |        |         |            |         |        |        |           |              |         |             |        |           |              |         |             |        |
| 8. 예민한 정도                                                                                                                                                                                                                                                                                                                                                   | 8a. 예민함-----                                                                                                                                                                                                                                                                                                                                                                                                                                                                                                                                                                                                                                                                                                                                                                                                                                                                                                                                                                                                                                                                                                            | 중간----- | 8b. 예민하지 않음  | 잘 모르겠음 |           |             |         |          |        |                      |               |         |            |        |        |                |         |             |        |               |                 |         |              |        |           |                  |         |          |        |       |              |         |         |        |         |            |         |        |        |           |              |         |             |        |           |              |         |             |        |
| 9. 산만한 정도                                                                                                                                                                                                                                                                                                                                                   | 9a. 산만함-----                                                                                                                                                                                                                                                                                                                                                                                                                                                                                                                                                                                                                                                                                                                                                                                                                                                                                                                                                                                                                                                                                                            | 중간----- | 9b. 산만하지 않음  | 잘 모르겠음 |           |             |         |          |        |                      |               |         |            |        |        |                |         |             |        |               |                 |         |              |        |           |                  |         |          |        |       |              |         |         |        |         |            |         |        |        |           |              |         |             |        |           |              |         |             |        |
| 추가 설명                                                                                                                                                                                                                                                                                                                                                       |                                                                                                                                                                                                                                                                                                                                                                                                                                                                                                                                                                                                                                                                                                                                                                                                                                                                                                                                                                                                                                                                                                                         |         |              |        |           |             |         |          |        |                      |               |         |            |        |        |                |         |             |        |               |                 |         |              |        |           |                  |         |          |        |       |              |         |         |        |         |            |         |        |        |           |              |         |             |        |           |              |         |             |        |
|                                                                                                                                                                                                                                                                                                                                                             |                                                                                                                                                                                                                                                                                                                                                                                                                                                                                                                                                                                                                                                                                                                                                                                                                                                                                                                                                                                                                                                                                                                         |         |              |        |           |             |         |          |        |                      |               |         |            |        |        |                |         |             |        |               |                 |         |              |        |           |                  |         |          |        |       |              |         |         |        |         |            |         |        |        |           |              |         |             |        |           |              |         |             |        |
| <p>2. 사회성</p> <p>"{아동이름}이 다른 사람들과 함께 있는 것을 즐거워하나요?"</p>                                                                                                                                                                                                                                                                                                     | 예                                                                                                                                                                                                                                                                                                                                                                                                                                                                                                                                                                                                                                                                                                                                                                                                                                                                                                                                                                                                                                                                                                                       | 아니요     | 잘 모르겠음       | 추가 설명  |           |             |         |          |        |                      |               |         |            |        |        |                |         |             |        |               |                 |         |              |        |           |                  |         |          |        |       |              |         |         |        |         |            |         |        |        |           |              |         |             |        |           |              |         |             |        |
|                                                                                                                                                                                                                                                                                                                                                             |                                                                                                                                                                                                                                                                                                                                                                                                                                                                                                                                                                                                                                                                                                                                                                                                                                                                                                                                                                                                                                                                                                                         |         |              |        |           |             |         |          |        |                      |               |         |            |        |        |                |         |             |        |               |                 |         |              |        |           |                  |         |          |        |       |              |         |         |        |         |            |         |        |        |           |              |         |             |        |           |              |         |             |        |

|                                                                                                                                                                                      |  |    |    |     |        |        |       |     |        |       |  |
|--------------------------------------------------------------------------------------------------------------------------------------------------------------------------------------|--|----|----|-----|--------|--------|-------|-----|--------|-------|--|
| 3. 사회적 친근함 / 애정 정도                                                                                                                                                                   |  |    |    |     |        |        | 예     | 아니요 | 잘 모르겠음 | 추가 설명 |  |
| <p>"{아동이름}가 보편적으로 다정한 편인가요?"</p> <p>"{아동이름}가 누구와 가장 친한가요?"</p> <p>두번째 질문에 대한 대답은 추가 설명란에 기입하십시오.</p>                                                                                 |  |    |    |     |        |        |       |     |        |       |  |
| 4. 아동이 애착을 보이는 사람                                                                                                                                                                    |  |    |    |     |        |        | 추가 설명 |     |        |       |  |
| <p>"{아동이름}이 누구에게 강한 애착을 보이나요? 어떤 방법으로 강한 애착을 표현하나요? 아동이 일반적으로 친근함을 표현하는 방법과 비슷하게 애착을 표현하는 경우라도 해당됩니다. 예를 들면, 그 사람이 다른 데로 가면 {아동이름}가 스트레스를 받거나, 그 사람이 다시오면, 매우 좋아하거나 하는 경우가 있나요?"</p> |  |    |    |     |        |        |       |     |        |       |  |
| 5. 또래와의 상호작용                                                                                                                                                                         |  |    |    |     |        |        | 추가 설명 |     |        |       |  |
| <p>"{아동이름}가 또래 아동들과 어떻게 상호작용하나요? 예를 들면, 또래 아동들과 놀이를 하나요? 놀이를 할 때에는 아이들과 잘 지내는 편인가요?"</p>                                                                                             |  |    |    |     |        |        |       |     |        |       |  |
| 6. 낯선 사람/상황에 대한 반응                                                                                                                                                                   |  | 자주 | 가끔 | 드물게 | 전혀 안 함 | 잘 모르겠음 | 추가 설명 |     |        |       |  |
| <p>"{아동이름}가 낯선 사람에 대한 무서움을 표현하나요? 익숙하지 않은 상황에 있을 때, 무서워하는 편인가요? {아동이름}가 처음 보는 사람이나 상황에 대해 반응을 했던 예를 말씀해주세요."</p>                                                                     |  |    |    |     |        |        |       |     |        |       |  |
| 7. 짜증/화                                                                                                                                                                              |  |    |    |     |        |        | 추가 설명 |     |        |       |  |
| <p>"많은 아이들이 극심한 짜증/화를 낼 때가 있지요. {아동이름}가 그럴때가 있나요? 있다면, 얼마나 자주 그러나요?"</p> <p>부모님/보호자가 "예"라고 대답할 경우, 다음 질문을 하십시오: "그럴 경우, 어떻게 반응을 하시는 편이세요?"</p>                                       |  |    |    |     |        |        |       |     |        |       |  |

|                                                                                                                                                                                                                            |              |
|----------------------------------------------------------------------------------------------------------------------------------------------------------------------------------------------------------------------------|--------------|
| <p>8. 자해 행동</p> <p>"{아동이름}가 화가 나면, 일부러 자기 몸을 다치게 하는 경우가 있나요? 아이들이 화가 나면, 자기 손을 깨물거나, 자기를 꼬집거나 하기도 합니다."</p> <p>부모님/보호자가 "예"라고 대답한 경우, 다음 질문을 하십시오: "{아동이름}가 어떻게 하나요? 이런 경우, 어떻게 반응하시는 편이세요?"</p>                           | <p>추가 설명</p> |
| <p>9. 공격적인 행동</p> <p>"아동이 일부러 다른 사람을 물거나, 때리거나, 꼬집어서 다치게 하는 경우가 있나요?"</p> <p>부모님/선생님이 "예"라고 대답하는 경우, 다음의 질문을 하십시오: "아동이 어떻게 하나요? 아동이 그럴 때, 어떻게 반응하시나요?"</p>                                                                | <p>추가 설명</p> |
| <p>10. 기물 파손</p> <p>"{아동이름}가 일부러 기물을 파손시키려고 했던 적이 있나요?"</p> <p>부모님/선생님이 '예'라고 대답한 경우, 다음 질문을 하십시오: "{아동이름}가 어떻게 하나요? 아동이 그럴 경우, 어떻게 반응하시나요?"</p>                                                                           | <p>추가 설명</p> |
| <p><u>영역 I 요약</u></p> <p>영역 II로 넘어가기 전에, 부모님/보호자가 영역 I에서 말한 것 중, 아동의 긍정적인 면을 2-3가지 정도 짧게 요약해서 말씀하여 주십시오.</p> <p>"그럼 지금까지 말씀해주신 것을 간단하게 정리하고 다음 영역으로 넘어가 볼게요. {아동이름}가 {2-3 가지 긍정적인 면} 하다고 말씀하셨죠. 더 말씀해 주실 것들이 혹시 있으세요?"</p> | <p>추가 설명</p> |

영역 I 이 끝났습니다.  
이제, 영역 II 로 가서, 질문하십시오.

## 영역 II. 의사소통 장애 아동과 가족 구성원에 대한 질문

감정 단어들은 "1차 감정"과 "2차 감정"에 대한 연구에서 인용되었습니다. (Ekman, Friesen, & Ellsworth, 1972 and Parrott, 2001)

이 영역은 가족 구성원들이 아동과 함께 어떻게 감정을 처리해 나가는지에 대해, 부모님/보호자가 대답하는 영역입니다. 선생님이나 치료사가 응답자인 경우, 해당 가족에 대해 관찰한 바를 대답하시면 됩니다.

### 1a. 아동이 표현하는 일반적인 감정

"먼저, 아이가 어떤 감정들을 표현하는지에 대해서 얘기해볼게요. 아이가 사랑의 감정, 화나는 감정 등의 감정을 자주 표현하는지, 가끔 혹은 드물게 표현하는지, 아니면, 전혀 표현을 안 하는지 말씀해주시면 됩니다. 잘 기억이 안 나시면, 그렇다고 말씀해주시면 됩니다. 아시겠죠?"

"얼마나 자주 아동이 [여기에 감정을 하나씩 넣어 질문하십시오]을 표현합니까?"

응답자가 "잘 모르겠다"고 대답하는 경우, "왜 잘 모르는지" 질문하십시오. 예를 들면, 응답자가 질문에 해당하는 상황을 관찰한 적이 없거나, 아동이 그러한 감정 표현을 할 기회가 없었을 수도 있습니다.

| 1a. 일반적인 감정 | 자주 | 가끔 | 드물게 | 전혀 안 함 | 잘 모르겠음 | 추가 설명 |
|-------------|----|----|-----|--------|--------|-------|
| 호감/사랑       |    |    |     |        |        |       |
| 화           |    |    |     |        |        |       |
| 싫어함         |    |    |     |        |        |       |
| 무서움         |    |    |     |        |        |       |
| 기쁨/행복       |    |    |     |        |        |       |
| 슬픔          |    |    |     |        |        |       |
| 놀람          |    |    |     |        |        |       |

### 1b. 아동이 표현하는 기타 감정들. [아동이 ...살 이상인 경우에만 이 질문을 하십시오. 아동이 그보다 어린 경우, 1c로 가서, 질문하십시오.]

"감사합니다. 지금까지 말씀 드린 감정들은 일찍 발달하는 감정들로 알려져 있습니다. 더 후에 발달하는, 표현하기 조금 더 어려운 감정들에 대해서도 여쭙보고 싶은데요, 제가 그 감정들을 하나씩 말씀 드리면, 아이가 이런 감정을 표현하는 것을 본 적이 있으신지 말씀해주 시면 됩니다."

"아이가 [여기에 감정을 하나씩 넣어 질문하십시오] 을 표현하나요?"

| 기타 감정들 | 예 | 아니오 | 추가 설명 |       | 예 | 아니오 | 추가 설명 |
|--------|---|-----|-------|-------|---|-----|-------|
| 동경     |   |     |       | 시기/질투 |   |     |       |
| 깜짝 놀람  |   |     |       | 자랑스러움 |   |     |       |
| 활기참    |   |     |       | 긴장    |   |     |       |
| 실망     |   |     |       | 좌절    |   |     |       |
| 흥분한    |   |     |       | 부끄러움  |   |     |       |

|                                                                                                                                                                                                                                                                                                 |                                                                                                                                        |        |
|-------------------------------------------------------------------------------------------------------------------------------------------------------------------------------------------------------------------------------------------------------------------------------------------------|----------------------------------------------------------------------------------------------------------------------------------------|--------|
| <p>1c. 아동이 표현하는 기타 감정들 [이 문제를 반드시 질문하십시오.]</p> <p>“혹시 지금까지 말씀해주신 감정 이외에 아이가 표현하는 감정이 있으면 말씀해주시겠어요?”</p> <p>응답자가 이 질문에 추가적인 대답을 하는 경우, 예시를 질문하십시오 - “언제 아이가 그런 감정을 표현하나요?”</p>                                                                                                                   |                                                                                                                                        | 기타 감정: |
| <p>2. 아동이 감정을 표현하는 방법</p> <p>“이제 {아동이름}가 어떻게 감정을 표현하는지에 대해서 여쭙볼 텐데요, 먼저, 아이가 감정을 표현할 수 있는 방법들을 하나씩 불러드릴게요. “예/아니요”로 하나씩 대답하시면 됩니다. 제가 빼먹은 방법이 있으면, 추가적으로 말씀해주셔도 됩니다.”</p> <p>다음의 리스트를 하나씩 질문하십시오.</p> <p>부모님/보호자가 “네”라고 대답하는 경우, 구체적인 예를 질문하십시오. 비언어적 방법과 언어적 감정 표현 방법의 리스트를 하나씩 모두 질문하십시오.</p> | 언어를 사용하지 않는 감정 표현 방법                                                                                                                   | 예시     |
|                                                                                                                                                                                                                                                                                                 | 언어를 사용하는 감정 표현 방법                                                                                                                      | 예시     |
| <p>분기점 #1.</p> <p>+ 언어를 사용하지 않는 감정표현 방법만 (얼굴표정부터 소리내기 까지) 사용한다고 대답한 경우, 바로 <u>문제 7 번</u>으로 가서 질문하십시오.</p> <p>+ 언어를 사용하는 감정표현 방법 (말부터 글쓰기 까지) 중 한 가지 방법이라도 사용한다고 대답한 경우, 다음 문제인 문제 3 번으로 가서 질문하십시오.</p>                                                                                          |                                                                                                                                        |        |
| <p>3. 그림/기호 갯수</p> <p>2번 질문에서 /그림이나 기호/문자/가 선택된 경우에만, 3a를 질문하십시오. 그렇지 않은 경우, 3b로 가서, 질문하십시오.</p> <p>3a. “아이가 감정을 표현할 때 (예: 행복해), 사용 할 수 있는 단어나 그림을 몇 개 가지고 있습니까? 어떤 단어/그림을 사용합니까?”</p>                                                                                                          | <p>○ 6 개 미만의 그림/기호/단어</p> <p>○ 6-10 개의 그림/기호/단어</p> <p>○ 11-20 개의 그림/기호/단어</p> <p>○ 20 개보다 많은 그림/기호/단어</p> <p>○ 50 개보다 많은 그림/기호/단어</p> | 예시     |



|                                                                                                                                                                                                                                                                                              |                                                                                                                                           |           |            |           |               |              |
|----------------------------------------------------------------------------------------------------------------------------------------------------------------------------------------------------------------------------------------------------------------------------------------------|-------------------------------------------------------------------------------------------------------------------------------------------|-----------|------------|-----------|---------------|--------------|
| <p>3b. "{아동이름}가 감정을 표현 때 (예: 행복해) 할 사용하는 수화, 단어, 혹은 그림/기호 중 몇 개를 사용합니까? 어떤 단어나 그림/기호를 사용합니까?"</p>                                                                                                                                                                                            | <p>○ 6 개 미만의 그림/기호/단어/수화<br/>○ 6-10 개의 그림/기호/단어/수화<br/>○ 11-20 개의 그림/기호/단어/수화<br/>○ 20 개보다 많은 그림/기호/단어/수화<br/>○ 50 개보다 많은 그림/기호/단어/수화</p> | <p>예시</p> |            |           |               |              |
| <p>3c. "{아동이름}가 느끼는 감정과 관련해서 이야기를 할 때, 몇 개의 그림/기호, 단어, 혹은 수화를 사용하나요? (예: 왜 그런 감정을 느끼는지, 그럴 때 어떻게 해줬으면 좋겠는지) {아동이름}가 어떤 단어를 사용하나요?"</p>                                                                                                                                                       | <p>○ 6 개 미만의 그림/기호/단어/수화<br/>○ 6-10 개의 그림/기호/단어/수화<br/>○ 11-20 개의 그림/기호/단어/수화<br/>○ 20 개보다 많은 그림/기호/단어/수화<br/>○ 50 개보다 많은 그림/기호/단어/수화</p> | <p>예시</p> |            |           |               |              |
| <p>4. 사용 환경<br/>"{아동이름}가 다양한 상황에서 (예: 집, 학교 등에서의 활동) 그림/기호, 단어 혹은 수화를 사용하나요? "</p>                                                                                                                                                                                                           | <p>자주</p>                                                                                                                                 | <p>가끔</p> | <p>드물게</p> | <p>전혀</p> | <p>잘 모르겠음</p> | <p>추가 설명</p> |
| <p>5. 다른 사람의 감정에 대해 이야기 하기<br/>"{아동이름}가 다른 사람이 표현하는 감정에 대해서 말을 하기도 하나요? 어떤 경우에 그러나요?"</p>                                                                                                                                                                                                    | <p>자주</p>                                                                                                                                 | <p>가끔</p> | <p>드물게</p> | <p>전혀</p> | <p>잘 모르겠음</p> | <p>예시</p>    |
| <p>6. 아동의 감정 표현을 돕기 위한 부모님/보호자의 격려<br/>"이제 아이에게 기대하시는 정도에 대해서 이야기 해볼텐데요, 얼마나 자주 {아동이름}가 그림/기호나 단어를 사용해서, 자기 감정에 대해 이야기 하도록 격려하시나요?"<br/>부모님/보호자가 "가끔" 혹은 "거의 항상"이라고 대답하는 경우, 어떻게 하시는 지 질문하십시오.<br/>부모님/보호자가 "드물게" 혹은 "전혀 안함"이라고 대답하는 경우, 다음 질문을 하십시오: "예, 감사합니다. 그럼 다른 어떤 방식으로 하고 계신지요?"</p> | <p>거의 항상</p>                                                                                                                              | <p>가끔</p> | <p>드물게</p> | <p>전혀</p> | <p>잘 모르겠음</p> | <p>예시</p>    |

|                                                                                                                                                                                                                    |  |  |  |  |  |  |                 |                            |                          |        |        |    |
|--------------------------------------------------------------------------------------------------------------------------------------------------------------------------------------------------------------------|--|--|--|--|--|--|-----------------|----------------------------|--------------------------|--------|--------|----|
| 7. 부모님/보호자의 반응<br>"{아동이름}가 감정을 표현할 때, 어떻게 반응하시는 편이세요?"<br>해당하는 모든 대답을 선택하십시오.                                                                                                                                      |  |  |  |  |  |  | 아이의 감정에 대해 이야기함 | 아이가 왜 그런 감정을 느끼는지에 대해 이야기함 | 아이가 느끼는 감정의 해결책에 대해 이야기함 | 전혀 안함  |        |    |
| 8. 아동의 감정 인식과 표현<br>8a. "{아동이름}가 다른 사람들의 감정에 어떻게 반응하는지에 대해서 이야기 해볼텐데요, {아동이름}가 다른 사람이 감정을 표현할 때 어떻게 반응하나요?<br>예를 들면, 생일 파티에서 다같이 생일 축하를 하며 기뻐할 때, {아동이름}도 같이 축하하며 기뻐하나요? 혹은 친구가 놀이터에서 무릎을 다치면, {아동이름}가 어떻게 반응하나요?" |  |  |  |  |  |  |                 |                            |                          |        |        |    |
| 8b. "{아동이름}가 대략 얼마나 자주 이런 반응을 보이나요?"                                                                                                                                                                               |  |  |  |  |  |  | 거의 항상           | 가끔                         | 드물게                      | 전혀 안 함 | 잘 모르겠음 | 예시 |
| 9. 보호자의 감정 표현: (질문 1)<br>"각각 가정마다 아이 앞에서 감정을 표현하는 정도와 방법이 다양하지요. {아동이름}이 함께 있을 때, 어떤 감정들을 표현하시는 편이세요? 어떤 상황에서 그렇게 하시나요? 어떤 이유로 그렇게 하시는 편이세요?"                                                                      |  |  |  |  |  |  |                 |                            |                          |        |        |    |
| 10. 보호자의 감정 표현: (질문 2)<br>"{아동이름}가 같이 있을 때, 표현하지 않으시려고 노력하시는 감정이 있으신가요? 어떤 상황에서 그러신가요? 왜 그렇게 하시는지요?"                                                                                                               |  |  |  |  |  |  |                 |                            |                          |        |        |    |

|                                                                                                                                                                                               |    |    |     |        |        |    |
|-----------------------------------------------------------------------------------------------------------------------------------------------------------------------------------------------|----|----|-----|--------|--------|----|
| 11. 감정 교육 방법<br>"아이에게 다양한 감정에 대해 가르쳐 주실 때, 어떻게 가르쳐 주시나요? 예를 들면, 책을 함께 읽으며 책에 나오는 감정에 대해 이야기 해 주시거나, 그 감정들을 흉내내 주시거나 하시나요?"                                                                    |    |    |     |        |        |    |
| 12. 긴장되는 상황에서 대처하기<br>"우리는 모두 어려운 일을 해야할 때, 긴장하게 마련이지요. 아이가 어려운 일을 앞두고 있을 때, 어떻게 준비하도록 도와주시나요? 그 어려운 일이 끝난 다음에는 어떻게 아이의 긴장을 풀어주시나요? 어떻게 하셨을 때, 가장 효과가 좋았었나요?<br>(예: 병원에 가야할 때, 학교에 첫등교 하는 날)" |    |    |     |        |        |    |
| 13. 미디어를 통해 배우기 (책, 영상 등) - 일반 질문<br>"[아동이름]가 이야기를 읽거나 듣는 것을 좋아합니까? 영상을 보는 것을 좋아합니까? [이 질문은 책, 이야기, 영상과 같은 미디어를 통해 아이들이 다양한 감정을 경험해볼 수 있다는 점을 기반으로 하였습니다.] 어떤 예가 있을까요?"                       | 자주 | 가끔 | 드물게 | 전혀 안 함 | 잘 모르겠음 | 예시 |
| 14. 미디어를 통해 배우기 (책, 영상 등) - 교육<br>"아이와 함께 책을 읽으시거나, 텔레비전이나 영화를 보실 때, 그 안에 나오는 캐릭터들이 느끼는 감정들에 대해서 아이에게 이야기 해 주시나요?"                                                                            |    |    |     |        |        |    |

아동의 감정 발달에 대한 검사를 모두 마쳤습니다.

참여해 주셔서 진심으로 감사 드립니다!
